# Supplementary material
Source: PubMed Central journal article supplement (PMC7673360)
Supplement: jexbio-223-233197-s1.pdf [file jexbio-223-233197-s1.pdf]

Figure S1

A

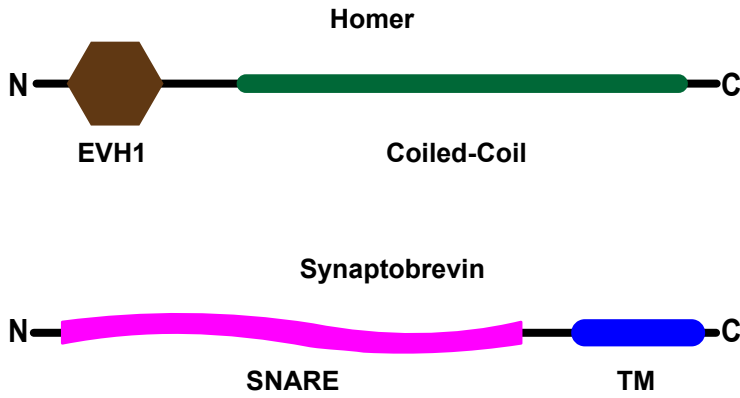

B

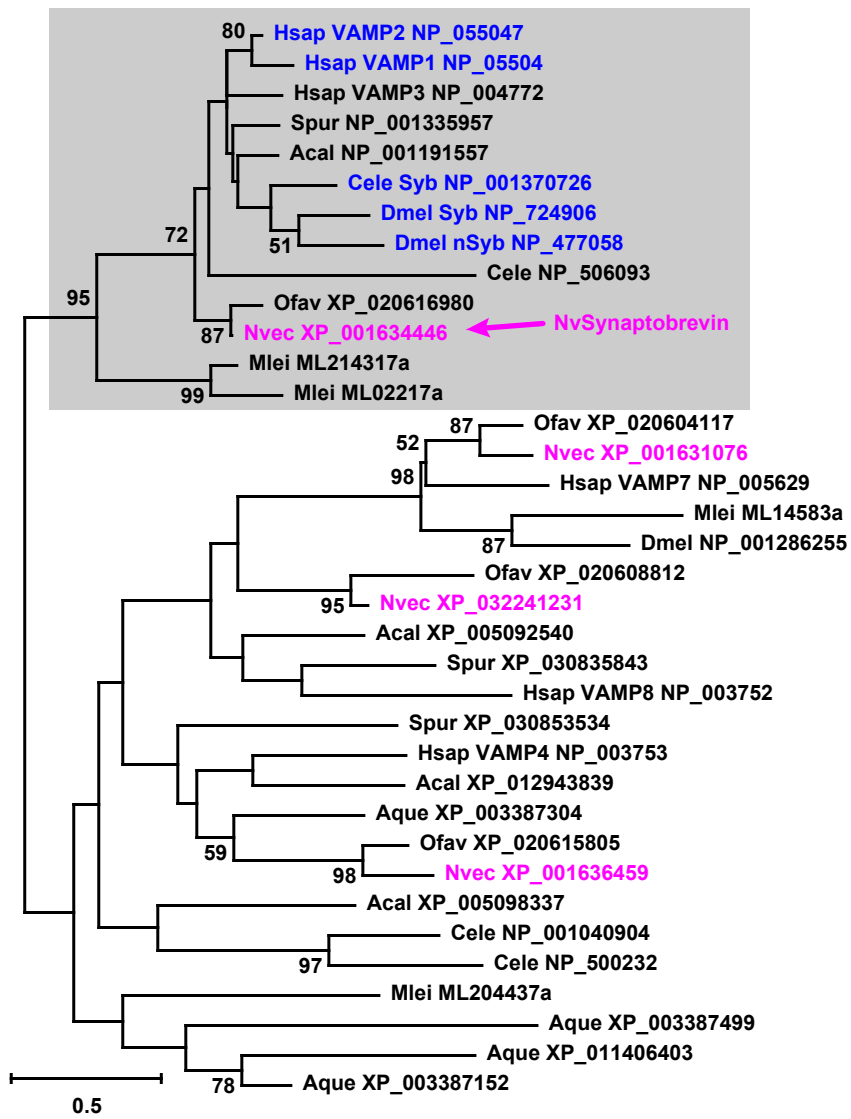

**Figure S1. Domain structure and conservation of synaptic markers in *Nematostella*.** (A)

Domain structures are shown for Homer proteins (top) and V-SNAREs (Bottom). Homer proteins contain an N-terminal EVH1 domain for binding target proteins and a C-terminal Coiled-coil domain that mediates tetramerization. V-SNAREs, the vesicular component of the SNARE complex that is required for exocytosis, have an N-terminal SNARE domain followed by a C-terminal transmembrane domain to anchor them in the vesicle. V-SNAREs do not share sufficient homology with other members of the SNARE complex for detection in BLAST searches. (B) Maximum Likelihood phylogeny of metazoan V-SNARE proteins based on the conserved protein core extending from the N-terminus of the SNARE domain to the C-terminus of the transmembrane domain (85 amino acids). The phylogeny was inferred in MEGA X (Kumar et al., 2018) using the Le Gascuel substitution model (Le and Gascuel, 2008), and the tree with the highest log likelihood (-4289.26) is displayed. A discrete Gamma distribution was used to model evolutionary rate differences among sites (5 categories, parameter = 1.3175). Numbers at nodes indicate percent support in 500 Bootstrap replications; only nodes with > 50% support are labeled. The highly supported Synaptobrevin clade is outlined with a gray box and NvSynaptobrevin is marked with an arrow. Branch lengths reflect substitutions/site and a scale bar is given. Branch labels give a species prefix, protein name if available, and Genbank accession number; *Nematostella* V-SNAREs are highlighted with magenta. Species prefixes are as follows: Acal, *Aplysia californica* (lophotrochozoan); Aque, *Amphimedon queenslandica* (sponge); Cele, *Caenorhabditis elegans* (protosome); Dmel, *Drosophila melanogaster* (protostome); Hsap, *Homo sapiens* (deuterostome); Mlei, *Mnemiopsis leidyi* (ctenophore); Nvec, *Nematostella vectensis* (cnidarian); Ofav, *Orbicella faveolata* (cnidarian); and Spur, *Strongylocentrotus purpuratus* (deuterostome).

Proteins for most species were collected from REFseq (Pruitt et al., 2012) using BLASTP (Altschul et al., 1997) searches with human VAMP1, VAMP4 and VAMP7 as queries. *Mnemiopsis leidyi* was the lone exception where the Mnemiopsis genome portal (Ryan et al., 2013) was used for BLAST searches of predicted proteins. Note we also searched the *Nematostella* genome draft but found no additional V-SNARE sequences. In all cases, default BLAST search parameters were sufficient to comprehensively identify V-SNARE sequences. Sequences were aligned using the MUSCLE algorithm (Edgar, 2004) as implemented in MEGA X (Kumar et al., 2018). File S2 contains the alignment used for phylogenetic analysis in FASTA format.

**Altschul, S. F., Madden, T. L., Schaffer, A. A., Zhang, J., Zhang, Z., Miller, W. and Lipman, D. J.** (1997). Gapped BLAST and PSI-BLAST: a new generation of protein database search programs. *Nucleic Acids Res* **25**, 3389-402.

**Edgar, R. C.** (2004). MUSCLE: multiple sequence alignment with high accuracy and high throughput. *Nucleic Acids Res* **32**, 1792-7.

**Kumar, S., Stecher, G., Li, M., Knyaz, C. and Tamura, K.** (2018). MEGA X: Molecular Evolutionary Genetics Analysis across Computing Platforms. *Mol Biol Evol* **35**, 1547-1549.

**Le, S. Q. and Gascuel, O.** (2008). An improved general amino acid replacement matrix. *Mol Biol Evol* **25**, 1307-20.

**Pruitt, K. D., Tatusova, T., Brown, G. R. and Maglott, D. R.** (2012). NCBI Reference Sequences (RefSeq): current status, new features and genome annotation policy. *Nucleic Acids Res* **40**, D130-5.

**Ryan, J. F., Pang, K., Schnitzler, C. E., Nguyen, A. D., Moreland, R. T., Simmons, D. K., Koch, B. J., Francis, W. R., Havlak, P., Program, N. C. S. et al.** (2013). The genome of the ctenophore *Mnemiopsis leidyi* and its implications for cell type evolution. *Science* **342**, 1242592.

**Dataset 1. Sequences of transgenic marker plasmids used in this study.**

[Click here to Download Dataset 1](#)

**Dataset 2. V-SNARE alignment used for the phylogeny in Figure S2.**

[Click here to Download Dataset 2](#)

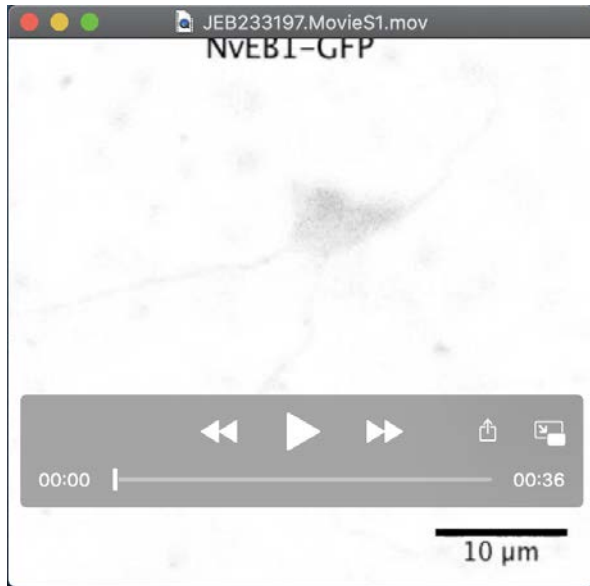

**Movie 1. LWamide1+ tripolar ganglion neuron expressing NvEB1-GFP.** In all three neurites the majority of NvEB1-GFP comets can be seen moving away from the cell body, indicating a plus-end out microtubule orientation.

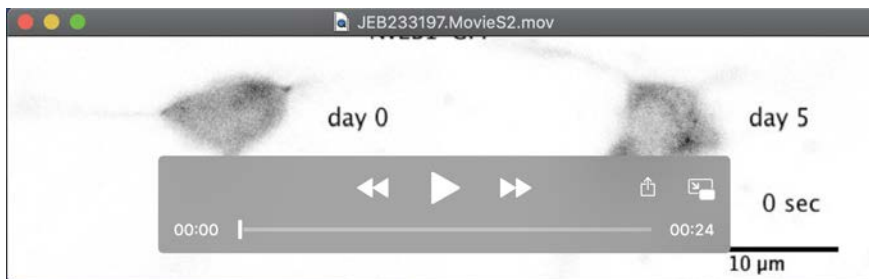

**Movie 2. Microtubule organizing center in LWamide1+ tripolar ganglion neuron expressing NvEB1-GFP.** Comets can be seen radiating from a single point in the cell body at day 0. This MTOC is still present at day 5.

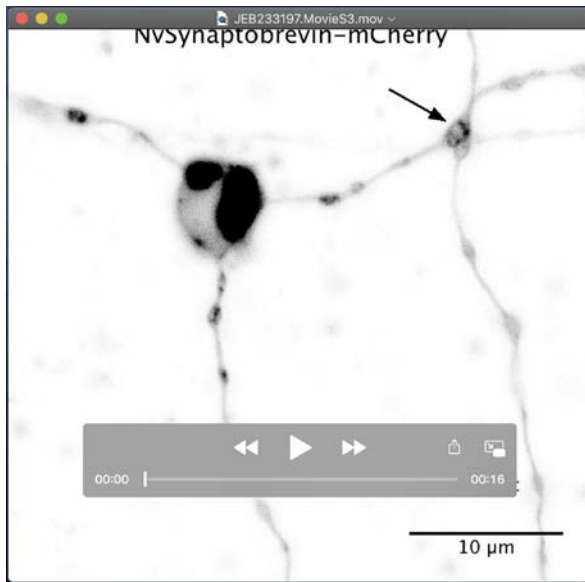

**Movie 3. LWamide1+ tripolar ganglion neuron expressing NvSynaptobrevin-mCherry.** The black arrow points to the site of two neurites crossing and NvSynaptobrevin-mCherry can be seen localized to the varicosities where they cross. Vesicles can be seen moving at these varicosities.

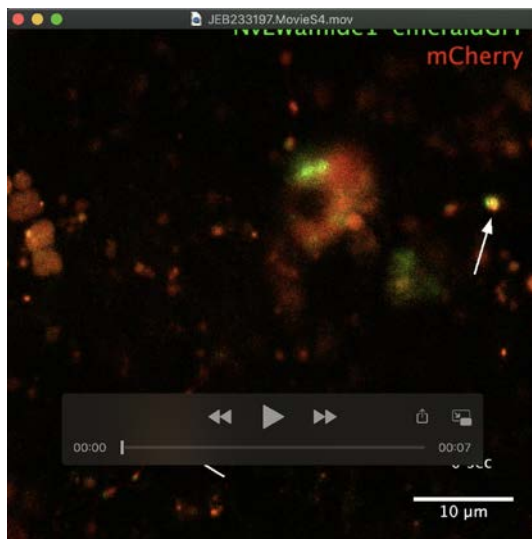

**Movie 4. LWamide1+ tripolar ganglion neuron expressing LWamide1-Emerald and cytoplasmic mCherry.** LWamide1-Emerald can be seen localizing to varicosities along the neurites as indicated by the white arrows. Vesicles can be seen moving at these varicosities.
